# Supplementary material for: The genome size, chromosome number and the seed adaption to long-distance dispersal of Ipomoea pes-caprae (L.)
Source: Frontiers journal article supplement (doi:10.3389/fpls.2023.1074935), 2023-03-02
Supplement: Data_Sheet_1.pdf [file Data_Sheet_1.pdf]

## Supplementary Figures and legends

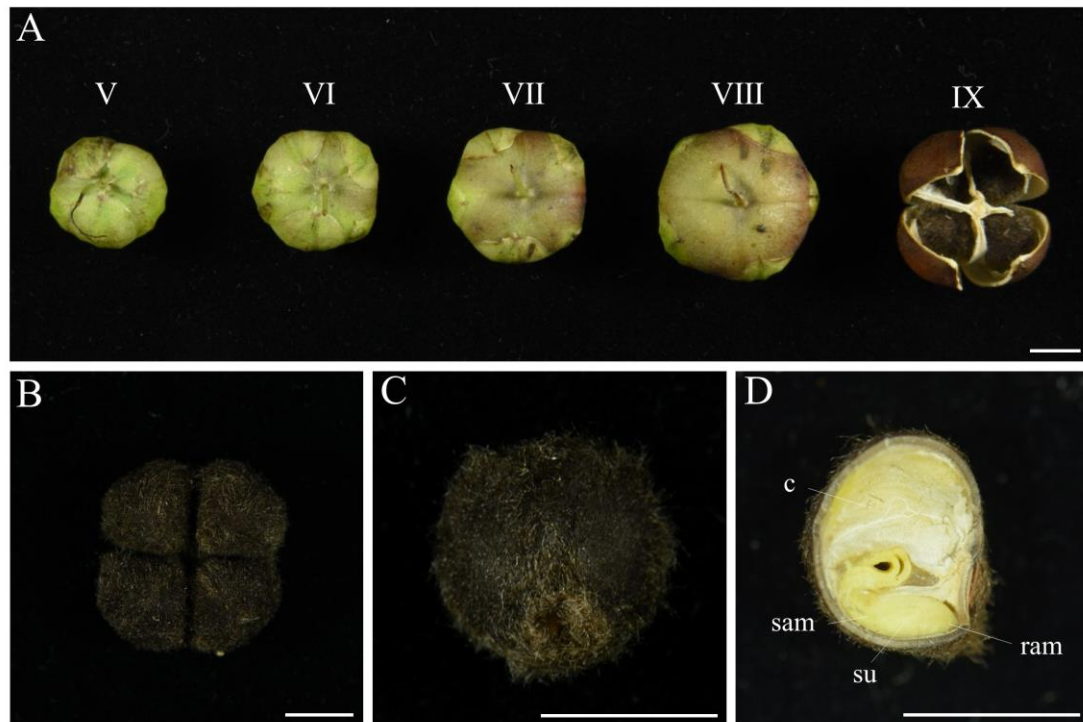

**Figure S1. Fruit and seed morphologies of IPC.** (A) Figures show the top view of fruits at IV-VIII stages. Bar = 0.5 cm. (B,C) Figures show the IPC mature seeds. Bar = 0.5 cm. (D) Images show the a dissected seed. Bar = 0.5 cm.

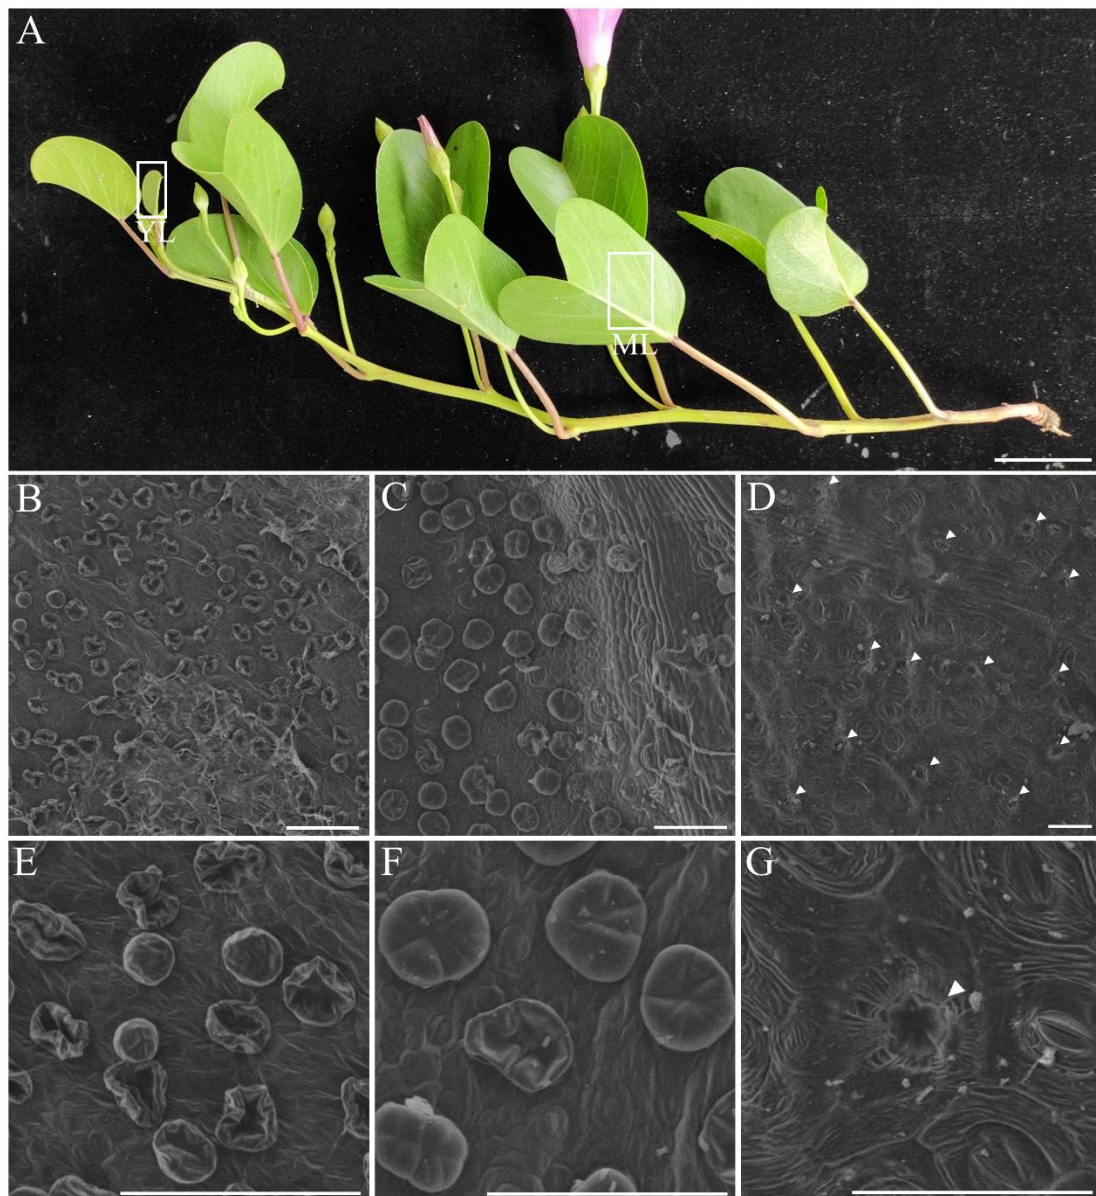

**Figure S2. The glandular trichomes on the surfaces of young and mature leaves.** (A) A flowering branch of IPC showed the leaves and floral inflorescence. (B, E) The GTs on the adaxial epidermis of IPC young leaf. (C, F) The GTs on the abaxial epidermis of IPC young leaf. (D, G) The degraded GTs on the abaxial epidermis of the IPC mature leaf. (YL, young leaf; ML, mature leaf; Bar for A = 2 cm; Bars for B-G = 100  $\mu\text{m}$ .)

**Table S1. Estimation of IPC genome size by flow cytometry analysis.**

|                                           | Replicate<br>s | Intensity<br>Reference | Intensity<br>IPC | Ratio | Genome<br>Size_Ref | Genome Size_IPC |
|-------------------------------------------|----------------|------------------------|------------------|-------|--------------------|-----------------|
| <b>External<br/>Reference:<br/>Tomato</b> | 1              | 43.63                  | 47.69            | 1.09  | 900.00             | 983.75          |
|                                           | 2              | 43.60                  | 47.67            | 1.09  | 900.00             | 984.01          |
|                                           | 3              | 43.56                  | 47.60            | 1.09  | 900.00             | 983.47          |
| <b>Internal<br/>Reference:<br/>Rice</b>   | 1              | 18.90                  | 48.71            | 2.58  | 420.00             | 1082.44         |
|                                           | 2              | 18.38                  | 47.31            | 2.57  | 420.00             | 1081.08         |
|                                           | 3              | 18.33                  | 47.29            | 2.58  | 420.00             | 1083.57         |

**Table S2. The germination and dormancy of IPC seeds.**

| Seed type | Treatment                | Swollen<br>rate_Mean | Swollen<br>rate_SD | Germinaiton<br>rate_Mean | Germination<br>rate_SD |
|-----------|--------------------------|----------------------|--------------------|--------------------------|------------------------|
| FH seeds  | Seed coats intact        | 0.67%                | 0.54%              | 0.00%                    | 0.00%                  |
|           | Seed coats broke<br>down | 99.78%               | 0.31%              | 11.11%                   | 4.94%                  |
| AR seeds  | Seed coats intact        | 0.22%                | 0.31%              | 0.00%                    | 0.00%                  |
|           | Seed coats broke<br>down | 100.00%              | 0.00%              | 88.44%                   | 2.27%                  |
